# Supplementary material for: Preparation of recoverable Fe3O4@PANI–PdII core/shell catalysts for Suzuki carbonylative cross-coupling reactions
Source: Royal Society of Chemistry journal article supplement (doi:10.1039/c4nj00697f), 2014-01-01
Supplement: c4nj00697f1.pdf [file c4nj00697f1.pdf]

Benzophenone.  $^1\text{H}$  NMR ( $\text{CDCl}_3$ , 400 MHz,  $25^\circ\text{C}$ )

$\delta$  7.82 (d,  $J_{\text{HH}}=8.2\text{Hz}$ , 4H), 7.61 (m, 2H), 7.50 (t,  $J_{\text{HH}}=7.6\text{ Hz}$ , 4H)

phenyl(*p*-tolyl)methanone.  $^1\text{H}$  NMR ( $\text{CDCl}_3$ , 400 MHz,  $25^\circ\text{C}$ )

$\delta$  7.78 (d,  $J_{\text{HH}}=7.2\text{Hz}$ , 2H), 7.72 (d,  $J_{\text{HH}}=8.0\text{Hz}$ , 2H), 7.57 (t,  $J_{\text{HH}}=7.4\text{ Hz}$ , 1H), 7.53 (t,  $J_{\text{HH}}=7.8\text{Hz}$ , 2H),  
7.28 (d,  $J_{\text{HH}}=8.0\text{Hz}$ , 2H), 2.43 (s, 3H)

(4-methoxyphenyl)(phenyl)methanone.  $^1\text{H}$  NMR ( $\text{CDCl}_3$ , 400 MHz,  $25^\circ\text{C}$ )

$\delta$  7.81 (d,  $J_{\text{HH}}=7.2\text{Hz}$ , 2H), 7.74 (d,  $J_{\text{HH}}=5.2\text{Hz}$ , 2H), 7.54 (t,  $J_{\text{HH}}=7.2\text{ Hz}$ , 1H), 7.44 (t,  $J_{\text{HH}}=7.4\text{Hz}$ , 2H),  
6.96 (d,  $J_{\text{HH}}=7.6\text{Hz}$ , 2H), 3.86 (s, 3H)

(4-chlorophenyl)(phenyl)methanone.  $^1\text{H}$  NMR ( $\text{CDCl}_3$ , 400 MHz,  $25^\circ\text{C}$ )

$\delta$  7.77 (m, 4H), 7.61 (m, 1H), 7.49 (m, 4H),
